# Supplementary material for: Construction of a genome-wide genetic linkage map and identification of quantitative trait loci for powdery mildew resistance in Gerbera daisy
Source: Front Plant Sci. 2023 Jan 6;13:1072717. doi: 10.3389/fpls.2022.1072717 (PMC9853552; doi:10.3389/fpls.2022.1072717)
Supplement: Supplementary file 2 [file Table_1.xlsx]

## Sheet: Supplementary Table 1
Supplementary Table 1. Area under powdery mildew disease progress curve (AUDPC) scores for individuals in the Gerbera daisy segregating population and their parents in 2018 and 2019.
Plant ID	AUDPC_2018	AUDPC_2019		Plant ID	AUDPC_2018	AUDPC_2019		Plant ID	AUDPC_2018	AUDPC_2019
Gh-4	14	4.08333		Gh-113	14.5	7.5		Gh-224	13.25	5.875
Gh-5	16.75	7.5		Gh-114	14.625	4.5		Gh-225	16.5	6.70833
Gh-7	15.375	4.875		Gh-115	13.375	6.41667		Gh-226	13.7917	5.75
Gh-12	14.875	4.5		Gh-116	15.7083	10.75		Gh-227	14.25	5.875
Gh-17	17.75	6.25		Gh-137	16.375	5.25		Gh-231	19.375	8.25
Gh-19	21.625	9.125		Gh-146	13	4.5		Gh-232	15.75	6.125
Gh-27	20.625	8.875		Gh-152	14.75	5.875		Gh-237	14.2917	7.375
Gh-29	16.125	5.58333		Gh-153	15.7083	7		Gh-241	13.25	5.375
Gh-31	18.7917	6.25		Gh-155	13.125	6.95833		Gh-242	20.3333	8.83333
Gh-43	18.125	8.91667		Gh-157	19.125	10.375		Gh-243	13.875	5.66667
Gh-44	16.125	5.45833		Gh-158	17.125	7.70833		Gh-244	15	4.66667
Gh-50	21.625	7.875		Gh-159	16.75	5.66667		Gh-245	14.6667	4.5
Gh-56	16.125	7.625		Gh-160	18	5.5		Gh-246	17.5833	9.5
Gh-62	16.875	6.875		Gh-162	17.1667	11.75		Gh-247	14.125	5.5
Gh-66	15.25	6.20833		Gh-163	15.125	8.04167		Gh-249	17.0833	7.66667
Gh-68	15.9167	7.375		Gh-165	14.125	4		Gh-250	16.4167	6.75
Gh-69	16.875	7.875		Gh-166	15	6.95833		Gh-251	17.125	5.25
Gh-76	15.75	9.625		Gh-191	11.6667	4.25		Gh-255	17.25	8.875
Gh-77	12.25	4.54167		Gh-192	17.75	6.25		Gh-260	18.375	7.41667
Gh-78	18.375	7.375		Gh-198	17.5	6.08333		Gh-267	19.3333	8.875
Gh-79	14	6.125		Gh-199	14.5833	6.16667		Gh-281	14.125	5.91667
Gh-80	16.5	13.25		Gh-200	17	7.75		Gh-284	17.4792	10.875
Gh-81	16.5	7.5		Gh-203	14.375	8		Gh-288	11.625	3.75
Gh-90	16.5833	5.625		Gh-205	13.75	7.75		Gh-295	17.375	5.875
Gh-94	14.5	6.9375		Gh-206	13.25	6.125		Gh-302	19.5	12.3333
Gh-96	17.625	6.5		Gh-207	14.8333	5.5		Gh-303	20	9.875
Gh-97	12.75	7.54167		Gh-210	14.125	4		Gh-306	20.5	13.25
Gh-98	15.25	5.08333		Gh-212	12.4167	3.5		Resistant parent	11.17	3.23
Gh-111	15.375	5.125		Gh-223	14.625	5.125		Susceptible parent	20.36	10.18
