# Supplementary material for: Construction of a genome-wide genetic linkage map and identification of quantitative trait loci for powdery mildew resistance in Gerbera daisy
Source: Front Plant Sci. 2023 Jan 6;13:1072717. doi: 10.3389/fpls.2022.1072717 (PMC9853552; doi:10.3389/fpls.2022.1072717)
Supplement: Supplementary file 3 [file Table_2.xlsx]

## Sheet: Supplementary Table 2
Supplementary Table 2. Numbers of SNPs and loci discovered in Gerbera breeding lines 06-245-03 (powdery mildew susceptible) and UFGE 4033 (powdery mildew resistant), two parents of the segregating population, and one resistant progeny pool consisting of 10 individuals and one susceptible progeny pool consisting of 14 individuals in the GBS experiments. In experiment1, restriction enzymes BamHI an…
Reads per sample		GBS experiment 1 (BamHI, NsiI)			GBS experiment 2 (BtgI, TaqI)
		Number of SNPs (filtered)	Number of Loci (filtered)		Number of SNPs (filtered)	Number of Loci (filtered)
500000		3426	2200		235	165
1000000		5301	3640		785	490
2000000		7029	4913		4059	2469
4000000		8327	5932		14826	9516
